# Supplementary material
Source: publisher figshare collection journal article supplement (https://frontiersin.figshare.com/ndownloader/files/24100622)
Supplement: Supplementary file [file 24100622]

**Table 2A. Validation of multiplex PCR assay set no. 1 to detect ‘non-top-7’ Shiga toxin producing *Escherichia coli* serogroups**

| Serogroups | Source of strains, Strain IDs |                                              |                           |                        |                              | No. of strains positive/No. of strains tested |
|------------|-------------------------------|----------------------------------------------|---------------------------|------------------------|------------------------------|-----------------------------------------------|
|            | Kansas State University       | Pennsylvania State University                | Michigan State University | University of Nebraska | Food and Drug Administration |                                               |
| O4         | 6282                          | O4 std., 14.0484, 14.0486, 14.1232           |                           |                        |                              | 5/5                                           |
| O80        |                               | O80 std., 13.0406, 12.3395, 9.1802 9.1803    |                           |                        |                              | 5/5                                           |
| O84        | 10340-1, 12824-1              |                                              |                           |                        |                              | 2/2                                           |
| O86        |                               | O86 std., 14.0607, 14.0615, 14.0747, 14.0748 |                           |                        |                              | 5/5                                           |
| O91        | 4162, sPRH-561                |                                              |                           |                        |                              | 2/2                                           |
| O109       | 12662-2, 15150-1, 15166-1     | 13.0166                                      |                           | E10F-6                 |                              | 5/5                                           |
| O156       |                               |                                              |                           |                        |                              | 4/4                                           |

O156 std.,  
15.0353,  
15.0354,  
15.0355

|      |                                                           |     |
|------|-----------------------------------------------------------|-----|
| O168 | O168 std.,<br>15.0133,<br>15.0181,<br>15.0185,<br>14.0047 | 5/5 |
|------|-----------------------------------------------------------|-----|

**Table 2B. Validation of multiplex PCR assay set no. 2 to detect ‘non-top-7’ Shiga toxin producing *Escherichia coli* serogroups**

| Serogroups    | Source of strains, Strain IDs |                                                           |                           |                        |                              | No. of strains positive/No. of strains tested |
|---------------|-------------------------------|-----------------------------------------------------------|---------------------------|------------------------|------------------------------|-----------------------------------------------|
|               | Kansas State University       | Pennsylvania State University                             | Michigan State University | University of Nebraska | Food and Drug Administration |                                               |
| O5            |                               | 14.0590,<br>14.1660                                       |                           |                        |                              | 2/2                                           |
| O13/O129/O135 |                               | 13.0102,<br>12.2598                                       |                           |                        |                              | 2/2                                           |
| O22           | 1245, 4590,<br>4570, 1027-4   | 13.0145                                                   |                           |                        |                              | 5/5                                           |
| O119          |                               | 15.1553                                                   |                           |                        |                              | 1/1                                           |
| O120          |                               | O120 std.,<br>13.0021,<br>13.0022,<br>13.0023,<br>13.0024 |                           |                        |                              | 5/5                                           |
| O123/O186     |                               | O123 std.,<br>8.0269, 7.0571<br>5.0769, 15.0862           |                           |                        |                              | 5/5                                           |
| O128          |                               | O128 std.,<br>13.0062,<br>13.0027,<br>13.1024,<br>14.0696 |                           |                        |                              | 5/5                                           |

|      |               |                                                       |     |
|------|---------------|-------------------------------------------------------|-----|
| O138 |               | O138 std.,<br>13.1113                                 | 2/2 |
| O171 | 1044-1, 12772 |                                                       | 2/2 |
| O175 |               | O175 std.,<br>9.1703, 10.0047,<br>10.0048,<br>10.0472 | 5/5 |

---

**Table 2C. Validation of multiplex PCR assay set no. 3 to detect ‘non-top-7’ Shiga toxin producing *Escherichia coli* serogroups**

| Serogroup | Source of strains, Strain IDs |                                                                 |                           |                        |                              | No. of strains positive/No. of strains tested |
|-----------|-------------------------------|-----------------------------------------------------------------|---------------------------|------------------------|------------------------------|-----------------------------------------------|
|           | Kansas State University       | Pennsylvania State University                                   | Michigan State University | University of Nebraska | Food and Drug Administration |                                               |
| O6        | 5750-1,<br>16857, 8276-1      |                                                                 |                           |                        |                              | 3/3                                           |
| O25       |                               | O25 std., 3.1421<br>14.1138,<br>14.1119,<br>14.0200,<br>14.0052 |                           |                        |                              | 6/6                                           |
| O33       |                               | O33 std.,<br>13.0050,<br>13.1199,<br>15.1254,<br>16.0504        |                           |                        |                              | 5/5                                           |
| O75       |                               | O75 std.,<br>11.1836,<br>12.0940,<br>12.0944,<br>12.1624        |                           |                        |                              | 5/5                                           |
| O79       |                               | O79 std., 5.2457                                                |                           |                        |                              | 2/2                                           |
| O98       | sPRH-571                      | 13.1267,<br>15.0710                                             |                           |                        |                              | 3/3                                           |

|      |                                                       |     |
|------|-------------------------------------------------------|-----|
| O116 | 1238-1, 1582-1, 99-3708, 3702-1, 7712-1, 7716, 7752-2 | 7/7 |
| O150 | 12.3283, 12.3280, 12.3284, 3.4896, 3.4897             | 5/5 |
| O181 | O181 std., 11.0228, 11.0392, 12.0697                  | 4/4 |

---

**Table 2D. Validation of multiplex PCR assay set no. 4 to detect ‘non-top-7’ Shiga toxin producing *Escherichia coli* serogroups**

| Serogroups | Source of strains, Strain IDs            |                                              |                           |                        |                              | No. of strains positive/No. of strains tested |
|------------|------------------------------------------|----------------------------------------------|---------------------------|------------------------|------------------------------|-----------------------------------------------|
|            | Kansas State University                  | Pennsylvania State University                | Michigan State University | University of Nebraska | Food and Drug Administration |                                               |
| O2/O50     | 99-18866, 99-18858                       | 14.1652                                      |                           |                        |                              | 3/3                                           |
| O15        | 2794, 18925-1, S918, s915, N5789, N15018 | O13 std.                                     | TW1681                    |                        |                              | 8/8                                           |
| O76        |                                          | O76 std., 14.0706, 14.0760, 14.0940, 14.0986 |                           |                        |                              | 5/5                                           |
| O78        | ATCC 35401, ATCC 43896                   | O78 std., 10.0182                            |                           |                        |                              | 4/4                                           |
| O113       | 1598-2, 1862-1, 3517                     |                                              |                           |                        |                              | 3/3                                           |
| O118/O151  | KDHE 14, KDHE 52                         | 13.1018                                      |                           |                        |                              | 3/3                                           |
| O126       | 99-17409                                 | 16.0457, 16.0511, 13.0069                    |                           |                        |                              | 4/4                                           |
| O146       |                                          |                                              |                           |                        |                              | 5/5                                           |

7.2907, 7.2663,  
7.2803, 7.3159,  
14.0976

|      |         |        |     |
|------|---------|--------|-----|
| O147 | 13466-1 | TW7464 | 2/2 |
|------|---------|--------|-----|

|      |                                                           |     |
|------|-----------------------------------------------------------|-----|
| O178 | O178 std.,<br>14.0800,<br>14.0828,<br>14.0829,<br>14.0908 | 5/5 |
|------|-----------------------------------------------------------|-----|

---



**Table 2E. Validation of multiplex PCR assay set no. 5 to detect ‘non-top-7’ Shiga toxin producing *Escherichia coli* serogroups**

| Serogroups | Source of strains, Strain IDs                                                                                                                                                          |                                     |                           |                        |                              | No. of strains positive/No. of strains tested |
|------------|----------------------------------------------------------------------------------------------------------------------------------------------------------------------------------------|-------------------------------------|---------------------------|------------------------|------------------------------|-----------------------------------------------|
|            | Kansas State University                                                                                                                                                                | Pennsylvania State University       | Michigan State University | University of Nebraska | Food and Drug Administration |                                               |
| O7         |                                                                                                                                                                                        | 16.0405,<br>14.0598,<br>14.0551     |                           |                        |                              | 3/3                                           |
| O8         | 2089-2, 4202,<br>4950-2,<br>sPRH-559,<br>5702-1, 6102-<br>2, 6504-1,<br>6846-2, 6849-<br>1, 15484-<br>1, 4544-1,<br>4964-1,<br>18370-1,<br>4542-1, 6412-<br>1, 6416-1,<br>5344-1, 5799 | 86.1006                             |                           |                        |                              | 19/19                                         |
| O20        | 5481                                                                                                                                                                                   |                                     |                           |                        |                              | 1/1                                           |
| O55        | 5906,<br>ATCC 12014                                                                                                                                                                    |                                     | TW04062,<br>TW08260       |                        |                              | 4/4                                           |
| O62/O68    |                                                                                                                                                                                        | O68 std., 1.2557,<br>4.0175, 4.2378 |                           |                        |                              | 4/4                                           |

|      |                                |                                 |     |
|------|--------------------------------|---------------------------------|-----|
| O87  |                                | 15.0108,<br>14.0979,<br>12.3233 | 3/3 |
| O92  |                                | 13.0124                         | 1/1 |
| O136 | 4709-1,<br>10314-1,<br>10320-1 | 14.0889                         | 4/4 |
| O163 | 9388-1,<br>13802-1,<br>18917-1 |                                 | 3/3 |

---

**Table 2F. Validation of multiplex PCR assay set no. 6 to detect ‘non-top-7’ Shiga toxin producing *Escherichia coli* serogroups**

| Serogroups | Source of strains, Strain IDs                      |                                 |                           |                        |                              | No. of strains positive/No. of strains tested |
|------------|----------------------------------------------------|---------------------------------|---------------------------|------------------------|------------------------------|-----------------------------------------------|
|            | Kansas State University                            | Pennsylvania State University   | Michigan State University | University of Nebraska | Food and Drug Administration |                                               |
| O38        | 748-1,<br>13950-1,<br>2072-3                       |                                 |                           |                        |                              | 3/3                                           |
| O39        |                                                    | 13.1182,<br>15.1383,<br>16.1097 |                           |                        |                              | 3/3                                           |
| O74        | 4558-1, 8608<br>13472-1,<br>1229-1                 |                                 |                           |                        |                              | 4/4                                           |
| O88        | 1235-1,<br>2076-2,<br>8652-1,<br>4560-1,<br>1240-2 |                                 |                           |                        |                              | 5/5                                           |
| O96        | 497, 3712-1,<br>18862-1,<br>3714-1                 |                                 |                           |                        |                              | 4/4                                           |
| O107/O117  | 3536-3,<br>9966-1<br>3534-1                        |                                 |                           |                        |                              | 3/3                                           |
| O108       | 9924-1                                             |                                 |                           |                        |                              | 1/1                                           |

|      |                                    |                                |     |
|------|------------------------------------|--------------------------------|-----|
| O115 |                                    | 13.1261                        | 1/1 |
| O130 | 492-1,1038-2,<br>1239-2,<br>3270-1 |                                | 4/4 |
| O132 | 2067-1,<br>sPRH-568                |                                | 2/2 |
| O141 |                                    | 13.1660,<br>14.0312<br>14.0314 | 3/3 |
| O153 | 1932, 9916-1                       |                                | 2/2 |

---

**Table 2G. Validation of multiplex PCR assay set no. 7 to detect ‘non-top-7’ Shiga toxin producing *Escherichia coli* serogroups**

| Serogroups           | Source of strains, Strain IDs |                                                   |                           |                        |                              | No. of strains positive/No. of strains tested |
|----------------------|-------------------------------|---------------------------------------------------|---------------------------|------------------------|------------------------------|-----------------------------------------------|
|                      | Kansas State University       | Pennsylvania State University                     | Michigan State University | University of Nebraska | Food and Drug Administration |                                               |
| O1                   |                               | 14.0223                                           |                           |                        | 6227                         | 2/2                                           |
| O17/O44/O73/O77/O106 |                               | 8.2525, 8.2526<br>14.0994,<br>14.0989,<br>14.0398 |                           |                        | 3829                         | 6/6                                           |
| O18                  |                               | 12.0213,<br>13.0442,<br>13.1139                   |                           |                        | 6853                         | 4/4                                           |
| O28                  |                               | 4.0349, 5.0190                                    |                           |                        | 6404-2                       | 3/3                                           |
| O35                  |                               | 1.2208, 6.089                                     |                           |                        | 6709                         | 3/3                                           |
| O37                  |                               | 5.0628, 7.3209                                    |                           |                        | 6594                         | 3/3                                           |
| O40                  |                               | 12.0572,<br>13.0486                               |                           |                        |                              | 2/2                                           |
| O43                  |                               | 12.0257,<br>15.1752,<br>16.0015                   |                           |                        | 6861                         | 4/4                                           |

|     |                                 |      |     |
|-----|---------------------------------|------|-----|
| O51 | 11.1861,<br>12.2022,<br>15.0773 | 3724 | 4/4 |
| O53 | 12.0583                         | 6503 | 2/2 |
| O69 | 14.1063,<br>14.1064             | 3560 | 3/3 |
| O70 | 95.1266,<br>96.1774             | 6388 | 3/3 |

---

**Table 2H. Validation of multiplex PCR assay set no. 8 to detect ‘non-top-7’ Shiga toxin producing *Escherichia coli* serogroups**

| Serogroups | Source of strains, Strain IDs |                                 |                           |                        |                              | No. of strains positive/No. of strains tested |
|------------|-------------------------------|---------------------------------|---------------------------|------------------------|------------------------------|-----------------------------------------------|
|            | Kansas State University       | Pennsylvania State University   | Michigan State University | University of Nebraska | Food and Drug Administration |                                               |
| O81        |                               | 14.1380,<br>14.1397             |                           |                        | 6754                         | 3/3                                           |
| O82        |                               | 14.0846,<br>15.0429             |                           |                        | 5541                         | 3/3                                           |
| O85        |                               | 15.1549,<br>16.0447             |                           |                        | 3620                         | 3/3                                           |
| O90/O127   |                               | 12.3598                         | TW4549                    |                        |                              | 2/2                                           |
| O102       |                               | 12.3542,<br>12.3624,<br>14.0030 |                           |                        | 3558                         | 4/4                                           |
| O105       |                               | 9.0695, 9.0698                  |                           |                        | 6810                         | 3/3                                           |
| O124/O164  |                               | 15.0880,<br>15.0790             |                           |                        |                              | 2/2                                           |
| O125       |                               | 13.0499,<br>13.1058             |                           |                        | 6517                         | 3/3                                           |
| O139       |                               | 13.0785,<br>14.0081             |                           |                        | 6672                         | 3/3                                           |
| O140       |                               | 12.066                          |                           |                        | 5737                         | 2/2                                           |

O148

12.3461,  
13.1357

2/2

---



**Table 2I. Validation of multiplex PCR assay set no. 9 to detect ‘non-top-7’ Shiga toxin producing *Escherichia coli* serogroups**

| Serogroups | Source of strains, Strain IDs |                               |                           |                        |                              | No. of strains positive/No. of strains tested |
|------------|-------------------------------|-------------------------------|---------------------------|------------------------|------------------------------|-----------------------------------------------|
|            | Kansas State University       | Pennsylvania State University | Michigan State University | University of Nebraska | Food and Drug Administration |                                               |
| O21        |                               | 9.0069, 12.3518               |                           |                        | 6508                         | 3/3                                           |
| O49        |                               | 13.0005                       |                           |                        | 5598                         | 2/2                                           |
| O93        |                               | 87.1672                       |                           |                        | 6613                         | 2/2                                           |
| O110       |                               | 12.2044                       |                           |                        | 3744                         | 2/2                                           |
| O114       |                               | 12.0637,<br>13.1247           |                           |                        | 6583                         | 3/3                                           |
| O149       |                               | 12.2184,<br>13.1187           |                           |                        | 6495                         | 3/3                                           |
| O154       |                               | 13.0130,<br>14.0265           |                           |                        | 6742                         | 3/3                                           |
| O161       |                               |                               |                           |                        | 6341                         | 1/1                                           |
| O169       |                               | 12.0689                       |                           |                        | 6992                         | 2/2                                           |

**Table 2J. Validation of multiplex PCR assay set no. 10 to detect ‘non-top-7’ Shiga toxin producing *Escherichia coli* serogroups**

| Serogroups | Source of strains, Strain IDs |                                 |                           |                        |                              | No. of strains positive/No. of strains tested |
|------------|-------------------------------|---------------------------------|---------------------------|------------------------|------------------------------|-----------------------------------------------|
|            | Kansas State University       | Pennsylvania State University   | Michigan State University | University of Nebraska | Food and Drug Administration |                                               |
| O46/O134   | 1223-4                        | 12.1020,<br>15.0242,<br>16.0631 |                           |                        | 3606                         | 5/5                                           |
| O152       |                               | 4.2414, 7.0560                  |                           |                        |                              | 2/2                                           |
| O159       | 1554-1                        | 12.1465                         |                           |                        |                              | 2/2                                           |
| O160       |                               | 15.1575,<br>14.0525             |                           |                        |                              | 2/2                                           |
| O165       | 7050-4                        | 13.0107,<br>14.1095             |                           |                        | 6757                         | 4/4                                           |
| O170       |                               | 13.0772,<br>14.1230             |                           |                        | 6833                         | 3/3                                           |
| O172       | 9042-1,<br>11154-1            |                                 |                           |                        |                              | 2/2                                           |
| O174       |                               | 14.153                          |                           |                        | 6129                         | 2/2                                           |
| O176       |                               | 14.0193                         |                           |                        | 6996                         | 2/2                                           |

|      |          |                                             |                            |     |
|------|----------|---------------------------------------------|----------------------------|-----|
| O177 |          | 14.1088,<br>14.1094                         | E28F-5,<br>89H-4,<br>58H-1 | 5/5 |
| O179 |          | 12.0472,<br>12.0696,<br>11.1855,<br>11.1606 |                            | 4/4 |
| O182 | sPRH-569 | 13.151, 14.1296                             | 5745                       | 4/4 |

---

**Table 2K. Validation of multiplex PCR assay set no. 11 to detect ‘non-top-7’ Shiga toxin producing *Escherichia coli* serogroups**

| Serogroups | Source of strains, Strain IDs |                               |                           |                        |                              | No. of strains positive/No. of strains tested |
|------------|-------------------------------|-------------------------------|---------------------------|------------------------|------------------------------|-----------------------------------------------|
|            | Kansas State University       | Pennsylvania State University | Michigan State University | University of Nebraska | Food and Drug Administration |                                               |
| O3         |                               | 14.1045,<br>14.1048           |                           |                        | 6291                         | 3/3                                           |
| O10        |                               | 7.1714                        |                           |                        | 6888                         | 2/2                                           |
| O11        |                               | 13.0841,<br>13.0861           |                           |                        | 6812                         | 3/3                                           |
| O16        |                               |                               |                           |                        | 6734                         | 1/1                                           |
| O19        |                               | 14.0988,<br>15.0093, 16.054   |                           |                        |                              | 3/3                                           |
| O23        |                               | 1.2315, 3.2841                |                           |                        | 6556                         | 3/3                                           |
| O29        | 10720-1                       | 1.1116                        |                           |                        | 3608                         | 3/3                                           |
| O63        |                               | 3.2810, 3.4555                |                           |                        | 6441                         | 3/3                                           |
| O101/O162  |                               |                               |                           | E907F-2                |                              | 1/1                                           |
| O112       |                               | 14.1406,<br>14.1409           |                           |                        | 5127                         | 3/3                                           |
| O131       |                               | 12.3205,<br>13.0803           |                           |                        | 6901                         | 3/3                                           |

**Table 2L Validation of multiplex PCR assay set no. 12 to detect ‘non-top-7’ Shiga toxin producing *Escherichia coli* serogroups**

| Serogroups | Source of strains, Strain IDs |                               |                           |                        |                              | No. of strains positive/No. of strains tested |
|------------|-------------------------------|-------------------------------|---------------------------|------------------------|------------------------------|-----------------------------------------------|
|            | Kansas State University       | Pennsylvania State University | Michigan State University | University of Nebraska | Food and Drug Administration |                                               |
| O9         |                               |                               |                           |                        | 6420, 6625                   | 2/2                                           |
| O27        |                               |                               |                           |                        | 6683                         | 1/1                                           |
| O41        |                               |                               |                           |                        | 6484, 6923                   | 2/2                                           |
| O48        |                               |                               |                           |                        | 6134, 6589                   | 2/2                                           |
| O54        |                               |                               |                           |                        | 6285, 6316                   | 2/2                                           |
| O56        |                               |                               |                           |                        | 5184                         | 1/1                                           |
| O60        |                               |                               |                           |                        | 3549, 5007                   | 2/2                                           |
| O142       |                               |                               |                           |                        | 5310, 6469                   | 2/2                                           |
| O143       |                               |                               |                           |                        | 5472, 6091                   | 2/2                                           |

**Table 2M. Validation of multiplex PCR assay set no. 13 to detect ‘non-top-7’ Shiga toxin producing *Escherichia coli* serogroups**

| <b>Serogroup</b> | <b>Source of strains, Strain IDs</b> |                                      |                                  |                               |                                     | <b>No. of strains positive/No. of strains tested</b> |
|------------------|--------------------------------------|--------------------------------------|----------------------------------|-------------------------------|-------------------------------------|------------------------------------------------------|
|                  | <b>Kansas State University</b>       | <b>Pennsylvania State University</b> | <b>Michigan State University</b> | <b>University of Nebraska</b> | <b>Food and Drug Administration</b> |                                                      |
| O12              |                                      |                                      |                                  |                               | 5736, 6756                          | 2/2                                                  |
| O58              |                                      |                                      |                                  |                               | 5900, 6698                          | 2/2                                                  |
| O64              |                                      |                                      |                                  |                               | 6400, 6661                          | 2/2                                                  |
| O83              |                                      |                                      |                                  |                               | 6046, 6431                          | 2/2                                                  |
| O133             |                                      |                                      |                                  |                               | 5695                                | 1/1                                                  |
| O166             |                                      |                                      |                                  |                               | 6593, 6649                          | 2/2                                                  |
| O167             |                                      |                                      |                                  |                               | 6743                                | 1/1                                                  |

**Table 2N. Validation of multiplex PCR assay set no. 14 to detect ‘non-top-7’ Shiga toxin producing *Escherichia coli* serogroups**

| Serogroups | Source of strains, Strain IDs |                               |                           |                        |                              | No. of strains positive/No. of strains tested |
|------------|-------------------------------|-------------------------------|---------------------------|------------------------|------------------------------|-----------------------------------------------|
|            | Kansas State University       | Pennsylvania State University | Michigan State University | University of Nebraska | Food and Drug Administration |                                               |
| O32        |                               |                               |                           |                        | 5773, 6555, 6573             | 3/3                                           |
| O65        |                               |                               |                           |                        | 5108, 5952                   | 2/2                                           |
| O66        |                               |                               |                           |                        | 6598, 6918                   | 2/2                                           |
| O71        |                               |                               |                           |                        | 3565, 6829                   | 2/2                                           |
| O100       |                               |                               |                           |                        | 6187, 6395                   | 2/2                                           |
| O144       |                               |                               |                           |                        | OR1                          | 1/1                                           |
| O173       |                               |                               |                           |                        | 5984                         | 1/1                                           |
| O180       |                               |                               |                           |                        | 5026, 6270                   | 2/2                                           |
